# Supplementary material for: Psychological and Physical Distress in Italian People during COVID-19 Pandemic: One Year Later
Source: MDPI journal article supplement (doi:10.3390/ijerph182312525), 2021-11-28
Supplement: s1 [file s1]

Table S1. Questionnaire attached in a supplementary file.

1. Are you a man or a woman? \*

- A) Man
- B) Woman

2. What age group do you belong to? \*

- A) <20 years
- B) between 21 and 45 years old
- C) between 46 and 60 years old
- D) > 60 years

3. What kind of work do you do? \*

- A) Freelance professional
- B) Employee
- C) Unemployed
- D) Other

4. In what part of Italy are you resident / domiciled? \*

- A) Northern Italy
- B) Central Italy
- C) Southern Italy & Islands

5. Specify the name of your region of residence / domicile below: \*

-----

6. Have there been any cases of COVID-19 in your region? \*

- A) Yes
- B) No
- C) I don't know

7. Since the COVID-19 pandemic started, have you moved to another region? \*

- A) Yes
- B) No

8. If the answer to the previous question is positive, the region you moved to belongs to:

- A) Northern Italy
- B) Central Italy
- C) Southern Italy & Islands

9. What is your perception of COVID-19 infections in your region? \*

- A) no contagion
- B) few infections
- C) many infections

10. Do you think that, compared to other regions, the one where you are managed the spread of the Pandemic better? \*

- A) Yes
- B) No
- C) I don't know

11. In your perception, are anti-contagion policies respected in your city? \*

- A) Not at all
- B) A little
- C) Enough
- D) A lot

12. How soon do you think we can return to normal, pre-pandemic life? \*

- A) Within a year
- B) Within two years
- C) We will never go back to normal
- D) I have no idea

13. Since the spread of COVID-19, have you decreased working from the office, in favour of Working from Home (WFH)? \*

- A) Yes
- B) Yes, only after the increase in the incidence of cases in my region
- C) No, my work does not include the possibility of WFH
- D) No, but I would have loved to
- E) I am unemployed

14. Do you think that in the last year, your level of psychological stress has increased? \*

- A) Yes
- B) No
- C) A little

15. Do you think that in the last year, your level of physical stress has increased? \*

- A) Yes
- B) No
- C) A little

16. Do you think you or someone in your family have experienced moments of depression related to the pandemic situation of the last year? \*

- A) Yes
- B) No
- C) I don't know

17. Compared to a year ago, before the beginning of the pandemic, do you think your desire to engage in social events has decreased? \*

- A) Not at all

- B) A little
- C) Enough
- D) A lot

18. In the last year, did you need to go to a specialist for psychological support? \*

- A) Yes
- B) No
- C) Sometimes
- D) I continue to go, even today

19. Have you had COVID-19? \*

- A) Yes
- B) No

20. Has anyone in your family been infected with COVID-19? \*

- A) Yes
- B) No

21. Were you part of the first vaccination campaign, and have you already got the second dose of the vaccine? \*

- A) Yes
- B) No
- C) I refused to be vaccinated

22. If the answer to the previous question is yes, do you feel psychologically safer, in case of a hypothetical contagion from COVID-19?

- A) Yes
- B) No
- C) I don't know

23. Did you need to go to the dentist during this pandemic year? \*

- A) Yes
- B) No
- C) I went only for Indifferent Urgencies

24. For treatments, you have gone to dental facilities:

- A) Public (hospitals, local health authorities, affiliated centers)
- B) Private Clinics

25. How many times have you been to the dentist in the last year of the pandemic? \*

- A) 0
- B) between 1-3 times
- C) more than 3 times

26. Do you think a dental visit is more dangerous for the possibility of transmission of COVID-19 than any other specialist medical visits? \*

- A) Yes, absolutely
- B) No, the risk is lower
- C) No, it is as dangerous as any other specialist medical visits
- D) I don't know

27. Are you concerned about the possibility of receiving dental visits / treatments safely?

- A) Yes
- B) No

28. Since the spread of the COVID-19 in our country, has your dentist taken

precautions or taken special measures while your professional activity? \*

- A) Yes
- B) No

29. Will you continue to go to the dentist with confidence in the coming months? \*

- A) Yes
- B) No

30. If you gave up going to the dentist, did you do it for fear of getting infected?

- A) Yes
- B) No
